# Supplementary material
Source: Elsevier journal article supplement (https://www.sciencedirect.com/science/article/pii/S021391112200108X)
Supplement: mmc1 [file S021391112200108X:mmc1.doc]

**Apéndice**

**Tabla I**

Salud autopercibida, características sociodemográficas yvariables relacionadas con los factores sociales de las personas participantes, por sexo, en Chile, durante el confinamiento por la COVID-19, sin ponderación

|  |  | **Total** |  | **Hombres** | | **Mujeres** |  |  |
| --- | --- | --- | --- | --- | --- | --- | --- | --- |
|  |  | **n** | **%** | **n** | **%** | **n** | **%** | **p**a |
|  |  | 5981 | 100 | 2157 | 36,06 | 3824 | 63,94 |  |
| **Salud autopercibida** | Buena | 4778 | 80,56 | 1781 | 83,38 | 2997 | 78,97 | <0,001 |
|  | Mala | 1153 | 19,44 | 355 | 16,62 | 798 | 21,03 |  |
| **Características sociodemográficas** | |  |  |  |  |  |  |  |
| Edad | 18-30 años | 1253 | 20,95 | 434 | 20,12 | 819 | 21,42 | 0,541 |
|  | 31-50 años | 3271 | 54,69 | 1185 | 54,94 | 2086 | 54,55 |  |
|  | 51-64 años | 1083 | 18,11 | 394 | 18,27 | 689 | 18,02 |  |
|  | 65 años o más | 374 | 6,25 | 144 | 6,68 | 230 | 6,01 |  |
| Educación | Primaria | 52 | 0,89 | 19 | 0,90 | 33 | 0,88 | 0,179 |
|  | Secundaria | 1661 | 28,34 | 630 | 29,79 | 1031 | 27,52 |  |
|  | Universitaria | 4148 | 70,77 | 1466 | 69,31 | 2682 | 71,60 |  |
| Pueblo originario | No | 5404 | 90,38 | 1919 | 89,01 | 3485 | 91,16 | **0,007** |
|  | Sí | 575 | 9,62 | 237 | 10,99 | 338 | 8,84 |  |
| **Condiciones materiales** | |  |  |  |  |  |  |  |
| Situación laboral | Trabajadores con contrato | 3432 | 58,10 | 1307 | 61,28 | 2125 | 56,31 | **<0,001** |
|  | Trabajadores independientes | 1113 | 18,84 | 447 | 20,96 | 666 | 17,65 |  |
|  | Trabajo informal/jubilado/  estudiante | 966 | 16,35 | 296 | 13,88 | 670 | 17,75 |  |
|  | Trabajo doméstico no remunerado | 229 | 3,88 | 14 | 0,66 | 215 | 5,70 |  |
|  | Desempleo | 167 | 2,83 | 69 | 3,23 | 98 | 2,60 |  |
| Cambio en situación laboral | Ha mejorado | 161 | 2,70 | 71 | 3,30 | 90 | 2,36 | 0,001 |
|  | Está igual | 2495 | 41,86 | 839 | 38,99 | 1656 | 43,49 |  |
|  | Ha empeorado | 3304 | 55,44 | 1242 | 57,71 | 2062 | 54,15 |  |
| Tenencia de vivienda | Propia (sin deudas) | 1591 | 29,88 | 570 | 29,46 | 1021 | 30,12 | 0,612 |
|  | Propia (con deudas) o arrendada | 3734 | 70,12 | 1365 | 70,54 | 2369 | 69,88 |  |
| Tamaño de vivienda | Menos de 50 m2 | 948 | 15,91 | 376 | 17,49 | 572 | 15,02 | 0,025 |
|  | De 50 a 80 m2 | 2146 | 36,02 | 778 | 36,19 | 1368 | 35,92 |  |
|  | Más de 80 m2 | 2864 | 48,07 | 996 | 46,33 | 1868 | 49,05 |  |
| Vivienda adecuada para el confinamiento | Mucho/bastante | 3778 | 63,37 | 1300 | 60,52 | 2478 | 64,97 | 0,002 |
|  | Moderada | 1356 | 22,74 | 515 | 23,98 | 841 | 22,05 |  |
|  | Poco/nada | 828 | 13,89 | 333 | 15,50 | 495 | 12,98 |  |
| **Condiciones psicosociales** | |  |  |  |  |  |  |  |
| Apoyo social | Sí | 5379 | 91,6 | 1934 | 91,66 | 3445 | 91,57 | 0,910 |
|  | No | 493 | 8,40 | 176 | 8,34 | 317 | 8,43 |  |
| Viviendo con personas dependientes | No | 2961 | 56,49 | 1130 | 60,30 | 1831 | 54,36 | <0,001 |
|  | Sí | 2281 | 43,51 | 744 | 39,70 | 1537 | 45,64 |  |
| Preocupación por convivencia en el hogar | No | 1397 | 26,71 | 464 | 24,87 | 933 | 27,73 | 0,025 |
|  | Sí | 3834 | 73,29 | 1402 | 75,13 | 2432 | 72,27 |  |
|  |  |  |  |  |  |  |  |  |
| Violencia en el hogar | No | 4726 | 89,92 | 1699 | 90,52 | 3027 | 89,58 | 0,281 |
|  | Sí | 530 | 10,08 | 178 | 9,48 | 352 | 10,42 |  |
| **Conductas asociadas a la salud** | |  |  |  |  |  |  |  |
| Consumo de tabaco | No consumo/sin cambios | 4524 | 80,50 | 1627 | 81,39 | 2897 | 80,01 | 0,455 |
|  | Disminución | 547 | 9,73 | 186 | 9,30 | 361 | 9,97 |  |
|  | Aumento | 549 | 9,77 | 186 | 9,30 | 363 | 10,02 |  |
| Consumo de alcohol | No consumo/sin cambios | 3477 | 61,84 | 1137 | 56,76 | 2340 | 64,64 | <0,001 |
|  | Disminución | 1198 | 21,31 | 528 | 26,36 | 670 | 18,51 |  |
|  | Aumento | 948 | 16,86 | 338 | 16,87 | 610 | 16,85 |  |
| Consumo de ansiolíticos o antidepresivos | No consumo/sin cambios | 4983 | 88,57 | 1850 | 92,41 | 3133 | 86,45 | <0,001 |
|  | Disminución | 80 | 1,42 | 24 | 1,20 | 56 | 1,55 |  |
|  | Aumento | 563 | 10,01 | 128 | 6,39 | 435 | 12,00 |  |
| Consumo de drogas ilegales | No consumo/sin cambios | 5076 | 90,24 | 1738 | 86,68 | 3338 | 92,21 | <0,001 |
|  | Disminución | 272 | 4,84 | 140 | 6,98 | 132 | 3,65 |  |
|  | Aumento | 277 | 4,92 | 127 | 6,33 | 150 | 4,14 |  |
| Actividad física | No realización/sin cambios | 2011 | 35,76 | 656 | 32,70 | 1355 | 37,46 | <0,001 |
|  | Disminución | 2735 | 48,64 | 1075 | 53,59 | 1660 | 45,89 |  |
|  | Aumento | 877 | 15,6 | 275 | 13,71 | 602 | 16,64 |  |
| **Salud y COVID-19** |  |  |  |  |  |  |  |  |
| Diagnóstico de COVID-19 | No | 5880 | 98,72 | 2118 | 98,7 | 3762 | 98,74 | 0,882 |
|  | Sí | 76 | 1,28 | 28 | 1,30 | 48 | 1,26 |  |
| Conviviendo con personas con síntomas o diagnóstico de COVID-19 | No | 5242 | 88,37 | 1873 | 87,81 | 3369 | 88,68 | 0,316 |
|  | Sí | 690 | 11,63 | 260 | 12,19 | 430 | 11,32 |  |
| **Medidas del gobierno** | |  |  |  |  |  |  |  |
| Medidas adecuadas del gobierno respecto a la pandemia | De acuerdo | 849 | 15,04 | 270 | 13,42 | 579 | 15,93 | 0,020 |
|  | Ni de acuerdo ni en desacuerdo | 276 | 4,89 | 91 | 4,52 | 185 | 5,09 |  |
|  | En desacuerdo | 4521 | 80,07 | 1651 | 82,06 | 2870 | 78,98 |  |

a Significación estadística entre hombres y mujeres según la prueba de ji al cuadrado.
